# Supplementary material for: Surface charge transfer induced p-CdS nanoribbon/n-Si heterojunctions as fast-speed self-driven photodetectors
Source: Royal Society of Chemistry journal article supplement (doi:10.1039/c5tc01016k), 2015-01-01
Supplement: c5tc01016k1.pdf [file c5tc01016k1.pdf]

## Supplementary information

# Surface charge transfer induced p-CdS Nanoribbon/n-Si heterojunction as fast-speed self-driven photodetector

By Chao Xie, Fangze Li, Longhui Zeng, Linbao Luo, Li Wang, Chunyan Wu, Jiansheng Jie

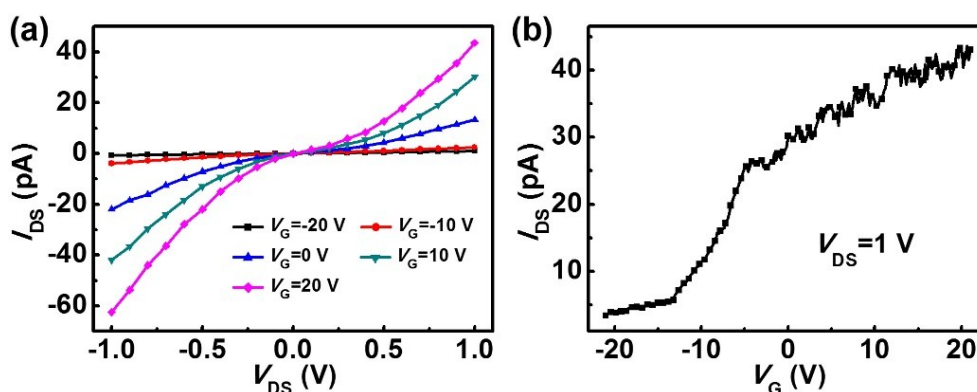

**Fig. S1** (a)  $I_{DS}$ - $V_{DS}$  characteristics of the FET measured at varied  $V_G$  ranging from -20 V to 20 V at a step of 10 V before coating with MoO<sub>3</sub> layer. (b) The transfer characteristic of the FET ( $V_{DS}=1$  V) before coating with MoO<sub>3</sub> layer.

**Calculation of the hole mobility/concentration of p-CdS NR:** The hole mobility ( $\mu_h$ ) of the MoO<sub>3</sub>-coated CdS NR FET can be estimated according to the formula:  $g_m = \partial I_{DS} / \partial V_G = (Z/L)\mu_h C_0 V_{DS}$ , where  $Z/L$  is the ratio of channel width to channel length and is equal to 1.15/12.5 for our configuration, and  $C_0 = 1.15 \times 10^{-8}$  F/cm<sup>2</sup> is the gate capacitance per unit area.<sup>1</sup> The transconductance ( $g_m$ ) is deduced to be  $\sim 0.39$   $\mu$ S by fitting the linear part of the  $I_{DS}$ - $V_G$  curve at a fixed  $V_{DS}$  of 0.2 V (Inset in Fig. 2(b)). Based on these values, a hole mobility of  $\mu_h = 1850$  cm<sup>2</sup>V<sup>-1</sup>s<sup>-1</sup> is obtained for as-prepared p-CdS NR. Then, the hole concentration ( $n_h$ ) is calculated to be  $6.62 \times 10^{17}$  cm<sup>-3</sup> based on the following relation:  $n_h = 1/\rho q \mu_h$ , where  $\rho$  is the channel electrical resistivity and  $p$  is the elementary charge.<sup>2</sup> Similarly, the electron mobility ( $\mu_e$ ) and electron concentration ( $n_e$ ) for u-CdS without MoO<sub>3</sub> coating can be estimated to be  $7.8 \times 10^{-3}$  cm<sup>2</sup>V<sup>-1</sup>s<sup>-1</sup> and  $2.11 \times 10^{15}$  cm<sup>-3</sup>, respectively, based on Fig. S1.

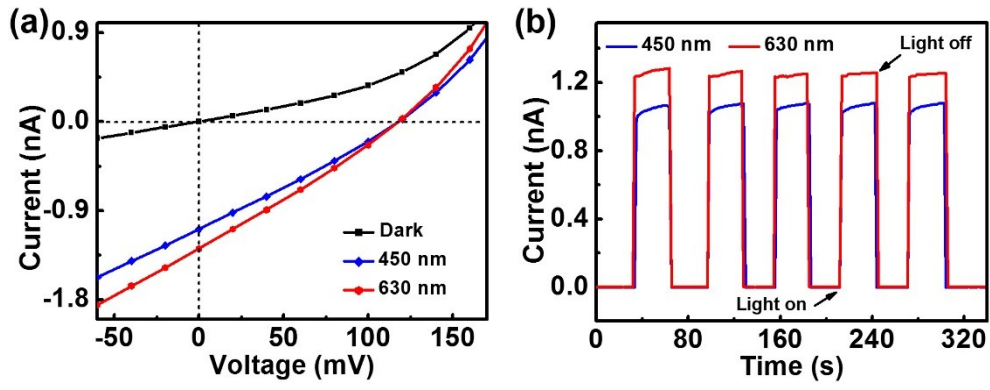

**Fig. S2** (a)  $I-V$  curves of the p-CdS NR/n-Si heterojunction in dark and under illuminations with wavelength of 450 nm and 630 nm (light intensity:  $\sim 1.1 \text{ mWcm}^{-2}$ ), respectively. (b) Time response of the heterojunction device to 450 nm and 630 nm light, respectively.

## References

- <sup>1</sup> J. S. Jie, W. J. Zhang, Y. Jiang and S. T. Lee, *Appl. Phys. Lett.*, 2006, **89**, 133118.
- <sup>2</sup> S. M. Sze and K. K. Ng, *John Wiley & Sons*, Hoboken, NJ, 2007.
